# Supplementary material for: Individual-level and plant-level predictors of acute, traumatic occupational injuries in a manufacturing cohort
Source: PubMed Central journal article supplement — Occup Environ Med. 2014 Apr 12;71(7):477–83. doi: 10.1136/oemed-2013-101827 (PMC4078708; doi:10.1136/oemed-2013-101827), 2014-04-12
Supplement: oemed-2013-101827-s1.pdf [file oemed-2013-101827-s1.pdf]

| <b>Supplemental Table 1. HR survey questions and Dimensions 1-4</b>                      | <b>Cronbach Alpha</b> |
|------------------------------------------------------------------------------------------|-----------------------|
| <b>Dimension 1: Overall satisfaction with the company</b>                                | 0.94                  |
| Overall, I am extremely satisfied with the company as a place to work.                   |                       |
| I am proud to work for the company.                                                      |                       |
| I would gladly refer a good friend or family member to the company for employment.       |                       |
| I believe the company has an outstanding future.                                         |                       |
| The leadership of the company has communicated a vision of the future that motivates me. |                       |
| I trust the leadership of the company.                                                   |                       |
| In the company there is open and honest two-way communication.                           |                       |
| The company provides me with the opportunity for learning and development.               |                       |
| I feel valued as an employee of the company.                                             |                       |
|                                                                                          |                       |
| <b>Dimension 2: Positive work environment</b>                                            | 0.90                  |
| I can see a clear link between my work and the company's objectives.                     |                       |
| My ideas and suggestions count.                                                          |                       |
| My job makes good use of my skills and abilities.                                        |                       |
| I am appropriately involved in decisions that affect my work.                            |                       |
| I feel encouraged to come up with new and better ways of doing things.                   |                       |
| My workgroup has a climate in which diverse perspectives are valued.                     |                       |
| I have the authority to correct problems as they occur.                                  |                       |
| Customer problems are dealt with quickly.                                                |                       |
| I work in an environment that promotes safety.                                           |                       |
| We do not compromise EHS values for the sake of production or profit.                    |                       |
|                                                                                          |                       |
| <b>Dimension 3: Positive perception of supervisor</b>                                    | 0.93                  |
| My immediate supervisor is an outstanding leader.                                        |                       |
| My immediate supervisor keeps his/her commitments.                                       |                       |
| I trust my immediate supervisor.                                                         |                       |
| My immediate supervisor clearly communicates what is expected of me.                     |                       |
| My immediate supervisor gives me feedback that helps me improve my performance.          |                       |
| My immediate supervisor treats me with respect and dignity.                              |                       |
|                                                                                          |                       |
| <b>Dimension 4: Job is stressful</b>                                                     | 0.80                  |
| I find my work stressful.                                                                |                       |
| I find that I am worn out at the end of the day.                                         |                       |
| I find that my work demands often interfere with my family life.                         |                       |
| I find that work issues remain on my mind after hours.                                   |                       |
